# Supplementary material for: BioBricks.ai: a versioned data registry for life sciences data assets
Source: Frontiers journal article supplement (doi:10.3389/frai.2025.1599412), 2025-08-13
Supplement: Data_Sheet_1.pdf [file Data_Sheet_1.pdf]

## Appendix A: User Guide – Installing, Using, and Developing with BioBricks.ai

This appendix provides practical instructions for users and developers to install BioBricks.ai, access data bricks, and build new bricks. It is intended for readers interested in applying BioBricks.ai in their own data workflows.

---

### A.1 Installation and Setup

BioBricks.ai is distributed as a Python package and is compatible with macOS, Linux, and Windows. We recommend using `pipx` to isolate the installation from your global Python environment.

#### Steps to Install and Configure BioBricks.ai:

```
bash

pipx install biobricks      # install CLI in isolated environment
biobricks configure        # create and configure your brick library
biobricks install <brickname> # install a specific brick, e.g. hgnc
```

You may also use `pip install biobricks` if `pipx` is unavailable. During configuration, you will be prompted to create a library path and enter your API token (available at <https://biobricks.ai>). Data will be stored locally in your configured library path with a `cache` subdirectory for efficient reuse across bricks.

---

### A.2 Using Installed Bricks

After installation, each brick provides access to one or more data assets (e.g., Parquet tables, SQLite databases). Assets can be listed and accessed using the CLI or programmatically.

#### Example: Accessing HGNC Brick in Python

```
Python

import biobricks as bb
import pandas as pd
```

```
hgnc = bb.assets('hgnc') # Load assets from the HGNC brick
df = pd.read_parquet(hgnc.hgnc_complete_set_parquet)
print(df.head())
```

Each asset is exposed as a named attribute (e.g., `hgnc_complete_set_parquet`) within the brick's namespace. Supported data formats include `.parquet`, `.sqlite`, and `.hdt`.

|       | hgnc_id    | symbol   | name                                              | locus_group         | ... | gtrnadb | agr        | mane_select                    | gencs      |
|-------|------------|----------|---------------------------------------------------|---------------------|-----|---------|------------|--------------------------------|------------|
| 0     | HGNC:5     | A1BG     | alpha-1-B glycoprotein                            | protein-coding gene | ... | None    | HGNC:5     | ENST00000263100.8 NM_130786.4  | None       |
| 1     | HGNC:37133 | A1BG-AS1 | A1BG antisense RNA 1                              | non-coding RNA      | ... | None    | HGNC:37133 | None                           | None       |
| 2     | HGNC:24086 | A1CF     | APOBEC1 complementation factor                    | protein-coding gene | ... | None    | HGNC:24086 | ENST00000373997.8 NM_014576.4  | None       |
| 3     | HGNC:7     | A2M      | alpha-2-macroglobulin                             | protein-coding gene | ... | None    | HGNC:7     | ENST00000318602.12 NM_000014.6 | HGNC:7     |
| 4     | HGNC:27057 | A2M-AS1  | A2M antisense RNA 1                               | non-coding RNA      | ... | None    | HGNC:27057 | None                           | None       |
| ...   | ...        | ...      | ...                                               | ...                 | ... | ...     | ...        | ...                            | ...        |
| 43713 | HGNC:25820 | ZYG11B   | zyg-11 family member B, cell cycle regulator      | protein-coding gene | ... | None    | HGNC:25820 | ENST00000294353.7 NM_024646.3  | HGNC:25820 |
| 43714 | HGNC:13200 | ZYX      | zyxin                                             | protein-coding gene | ... | None    | HGNC:13200 | ENST00000322764.10 NM_003461.5 | None       |
| 43715 | HGNC:51695 | ZYXP1    | zyxin pseudogene 1                                | pseudogene          | ... | None    | HGNC:51695 | None                           | None       |
| 43716 | HGNC:29027 | ZZEF1    | zinc finger ZZ-type and EF-hand domain contain... | protein-coding gene | ... | None    | HGNC:29027 | ENST00000381638.7 NM_015113.4  | None       |
| 43717 | HGNC:24523 | ZZZ3     | zinc finger ZZ-type containing 3                  | protein-coding gene | ... | None    | HGNC:24523 | ENST00000370801.8 NM_015534.6  | None       |

[43718 rows x 54 columns]

**Figure A. 1** Data in `hgnc.hgnc_complete_set_parquet`

### A.3 Brick Repository Structure

Each BioBrick is implemented as a Git repository. The standard structure includes:

```
bash

/brick          # Final data outputs (e.g., .parquet, .sqlite)
.dvc/           # DVC tracking files
.bb/            # Metadata and dependencies
dvc.yaml        # Defines build stages (ETL pipeline)
dvc.lock        # Records hashes of input/output files
```

Assets are built via DVC pipelines to ensure reproducibility. Dependencies between bricks are declared in `.bb/dependencies.txt`.

### A.4 Example: Building the SMRT Brick

To build a brick locally, clone a brick repository (e.g., SMRT), and run the ETL pipeline:

```
bash
```

```
git clone https://github.com/biobricks-ai/SMRT.git
cd SMRT
dvc repro # Runs ETL pipeline: check → download → process
```

### Pipeline stages:

1. **Status** – Checks for upstream data changes
2. **Download** – Fetches raw data
3. **Process** – Transforms data into the final brick format

Bricks can also be built or explored in cloud environments (e.g., GitHub Codespaces).

---

## A.5 Publishing New Bricks (For Developers)

Developers invited to contribute bricks can use the [brick-template](#) repository to scaffold a new dataset.

### Typical process:

1. Clone the template
2. Customize the ETL stages in `dvc.yaml`
3. Run the pipeline `dvc repro`
4. Push built assets: `dvc push -r s3.biobricks.ai`

Submit the repository for review by the BioBricks core team. A new `biobricks push` feature (coming soon) will support broader community submissions.

---

## A.6 Resources

**Website:** <https://biobricks.ai>

**CLI Package (Python):** <https://pypi.org/project/biobricks/>

**R Client:** Available via CRAN (`install.packages("biobricks")`)

**Documentation:** <https://docs.biobricks.ai>

**GitHub Repos:** <https://github.com/biobricks-ai>

**License:** MIT (Open Source)

For further questions, refer to the documentation or contact the BioBricks.ai team via GitHub or the support channels listed on the website.
